# Supplementary material
Source: publisher figshare collection journal article supplement (https://geolsoc.figshare.com/ndownloader/files/5425640)
Supplement: Supplementary file 1 [file 5425640]

"Table 19. Results of laser fusion 40Ar/39Ar dating of single crystals of anorthoclase from pumice clasts from the Silbo Tuff, Chari Member,",,,,,,,,,,
"Koobi Fora Formation. 93-1074 (field number K93-6016) from Area 7, Ileret; 93-1083 (field number K93-6026) and 81-155 and 81-161 from ",,,,,,,,,,
"near Shin, photolocality 1816/152-110",,,,,,,,,,
,,,,,,,,,,
,,,,,,,,,,
Sample,36Ar/39Ar,37Ar/39Ar,40Ar/39Ar,K/Ca,40Ar*/39ArK,% 40Ar*,39Ar,Calculated age,,
,x 10-3,x 10-3,,,± c.v.,,10-14 mol,Ma ± 1 s.d.,,
,,,,,,,,,,
"93-1074 anorthoclase; J = 5.314E-4 ± 0.30%; level 10, ANU54",,,,,,,,,,
1,2.203,1.447,1.428,364,0.748 ± 1.72%,52.4,1.94,0.717 ± 0.012,,
  [2,3.351,3.809,1.849,138,0.830 ± 1.69%,44.9,1.2,0.796 ± 0.014],,
3,0.646,2.534,0.996,208,0.777 ± 0.82%,78,1.68,0.744 ± 0.006,,
4,4.265,0.419,2.063,1257,0.774 ± 1.67%,37.5,2.69,0.742 ± 0.013,,
5,0.992,2.207,1.094,238,0.773 ± 0.73%,70.6,2.06,0.741 ± 0.006,,
6,4.288,0.507,2.078,1037,0.783 ± 1.50%,37.7,1.87,0.750 ± 0.011,,
7,4.816,1.728,2.244,305,0.792 ± 2.42%,35.3,1.93,0.759 ± 0.019,,
8,0.413,0.712,0.936,740,0.785 ± 0.95%,83.9,2,0.753 ± 0.007,,
9,5.501,1.705,2.433,309,0.778 ± 2.30%,32,1.55,0.746 ± 0.017,,
10,5.111,0.18,2.279,2928,0.740 ± 2.17%,32.5,1.69,0.710 ± 0.016,,
11,3.129,0.198,1.686,2658,0.732 ± 2.22%,43.4,1.43,0.702 ± 0.016,,
12,0.921,1.231,1.104,428,0.803 ± 1.16%,72.7,1.1,0.770 ± 0.009,,
13,1.335,0.624,1.193,844,0.770 ± 1.68%,64.5,1.33,0.738 ± 0.013,,
14,6.188,-,2.654,-,0.797 ± 2.07%,30,1.17,0.764 ± 0.016,,
,                   Arithmetic mean K/Ca (n = 12 ),,,943 ± 929,                      Arithmetic mean age (n = 13),,,0.741 ± 0.021,,
,,,,,                        Weighted mean age ( n = 13),,,0.744 ± 0.004,,
,,,,,,,,,,
"93-1083 anorthoclase; J = 5.335E-4 ± 0.30%; level 12, ANU54",,,,,,,,,,
1,0.804,1.394,1.059,377,0.793 ± 1.85%,74.9,0.62,0.763 ± 0.014,,
 [2,47.35,2.251,14.861,234,0.840 ± 9.93%,5.7,1.53,0.808 ± 0.080],,
3,17.809,-,6.064,-,0.773 ± 4.18%,12.7,1.68,0.743 ± 0.031,,
4,1.383,0.801,1.19,657,0.753 ± 1.34%,63.3,1.83,0.725 ± 0.010,,
5,0.846,1.206,1.057,436,0.778 ± 0.41%,73.6,1.7,0.749 ± 0.004,,
6,11.864,-,4.331,-,0.796 ± 2.96%,18.4,2,0.766 ± 0.023,,
7,0.836,1.112,1.052,473,0.776 ± 0.89%,73.8,2.15,0.747 ± 0.007,,
8,9.515,-,3.605,-,0.765 ± 3.27%,21.2,1.62,0.736 ± 0.024,,
9,30.757,1.639,9.898,321,0.781 ± 7.39%,7.9,1.8,0.752 ± 0.056,,
10,0.956,0.824,1.079,639,0.768 ± 0.85%,71.2,2.33,0.739 ± 0.007,,
11,1.274,1.398,1.177,367,0.772 ± 0.65%,65.6,1.42,0.742 ± 0.005,,
12,2.713,-,1.601,-,0.771 ± 2.07%,48.1,1.25,0.742 ± 0.016,,
13,2.437,2.972,1.523,177,0.775 ± 0.99%,50.9,1.85,0.745 ± 0.008,,
14,0.942,0.386,1.08,1363,0.773 ± 1.20%,71.6,1.38,0.744 ± 0.009,,
15,3.089,-,1.717,-,0.776 ± 1.39%,45.2,2.1,0.746 ± 0.011,,
,                     Arithmetic mean K/Ca (n =  9),,,900 ± 345,                      Arithmetic mean age (n = 14),,,0.746 ± 0.010,,
,,,,,                        Weighted mean age (n = 14),,,0.745 ± 0.003,,
,,,,,,,,,,
"81-155 anorthoclase; J = 5.254E-4 ± 0.50%; level 12, ANU11",,,,,,,,,,
1,1.228,-,1.194,-,0.807 ± 1.32%,67.6,1.94,0.765 ± 0.011,,
2,0.707,-,1.019,-,0.787 ± 1.40%,77.2,1.29,0.745 ± 0.011,,
3,1.136,-,1.12,-,0.760 ± 1.06%,67.9,1.46,0.721 ± 0.008,,
4,1.32,38.33,1.285,137,0.871 ± 1.24%,67.8,1.03,0.826 ± 0.011,,
5,10.548,-,4.008,-,0.868 ± 3.07%,21.6,1.75,0.822 ± 0.026,,
6,3.226,-,1.78,-,0.803 ± 1.82%,45.4,2.37,0.760 ± 0.014,,
9,0.573,-,0.994,-,0.801 ± 4.13%,80.6,0.38,0.759 ± 0.032,,
10,1.147,-,1.133,-,0.790 ± 0.58%,69.7,2.96,0.748 ± 0.005,,
11,0.983,-,1.096,-,0.822 ± 0.53%,75,1.48,0.779 ± 0.005,,
12,3.833,-,1.946,-,0.803 ± 3.53%,41.3,4.27,0.761 ± 0.027,,
13,2.707,-,1.563,-,0.813 ± 2.35%,52,2.46,0.771 ± 0.018,,
15,3.818,-,1.939,-,0.806 ± 1.51%,41.5,3.16,0.763 ± 0.012,,
,,,,,                     Arithmetic mean age (n = 12),,,0.768 ± 0.030,,
,,,,,                       Weighted mean age (n = 12),,,0.763 ± 0.004,,
,,,,,,,,,,
"81-161 anorthoclase; J = 5.243E-4 ± 0.50%; level 13, ANU11",,,,,,,,,,
1,0.364,-,0.932,-,0.799 ± 0.59%,85.8,2.01,0.756 ± 0.006,,
3,2.114,23.91,1.467,220,0.817 ± 1.80%,55.7,1.25,0.773 ± 0.014,,
 [4,1.754,46.35,1.399,114,0.856 ± 3.26%,61.2,1.16,0.809 ± 0.027],,
5,0.33,-,0.913,-,0.790 ± 1.18%,86.6,1.19,0.747 ± 0.010,,
6,2.804,45.83,1.675,115,0.821 ± 1.16%,49.1,2.93,0.777 ± 0.010,,
7,0.262,-,0.88,-,0.777 ± 1.52%,88.4,1.45,0.735 ± 0.012,,
8,0.3,-,0.901,-,0.787 ± 0.89%,87.4,1.39,0.744 ± 0.008,,
9,0.281,-,0.884,-,0.775 ± 0.65%,87.8,1.64,0.733 ± 0.006,,
   [10,0.535,-,0.899,-,0.740 ± 1.32%,82.3,2.47,0.700 ± 0.010],,
11,0.801,-,1.037,-,0.788 ± 0.51%,76,4.69,0.745 ± 0.005,,
12,1.422,-,1.214,-,0.786 ± 1.41%,64.8,3.38,0.744 ± 0.011,,
    [13,1.987,-,1.394,-,0.907 ± 12.6%,65,2.32,0.858 ± 0.108],,
14,2.281,-,1.471,-,0.792 ± 1.29%,55.8,2.97,0.749 ± 0.010,,
15,2.631,-,1.59,-,0.805 ± 3.03%,50.6,3.51,0.761 ± 0.023,,
,,,,,                      Arithmetic mean age (n = 11),,,0.751 ± 0.014,,
,,,,,                       Weighted mean age (n =  11),,,0.747 ± 0.004,,
,,,,,,,,,,
,,,,,,,,,,
,,,
l = 5.543 x 10-10 a-1  ,Sensitivity ~2.6 x 1 0-17 mol/mV,Bracketed results excluded from mean age calculation,
(36Ar/37Ar)Ca = 3.50 x 10-4    (39Ar/37Ar)Ca = 7.86 x 10-4     ," (40Ar/39Ar)K = 0.0287 (93-1074, 93-1083); 0.024 (81-155, 81-161)",,
40Ar* – radiogenic 40Ar,,39Ar – K-derived 39Ar,Quoted error in each age includes estimated error in  J
"Mass of alkali feldspar used in each analysis: 1.3 to 4.6 mg.   Irradiated for 24 hours in X33 or X34, HIFAR  nuclear reactor",,,
Fluence monitor: 92-176 sanidine from Fish Canyon Tuff; K/Ar reference age: 28.1 Ma,,,
